1 **Stochastic bacterial population dynamics prevent the emergence of**  
2 **antibiotic resistance from single cells**

3

4 **Helen K. Alexander<sup>1,2,\*</sup>, R. Craig MacLean<sup>1</sup>**

5

6 <sup>1</sup> Department of Zoology, University of Oxford, 11a Mansfield Rd, Oxford, OX1 3PS, United Kingdom

7 <sup>2</sup> Current address: Institute of Evolutionary Biology, University of Edinburgh, Charlotte Auerbach Rd,  
8 Edinburgh, EH9 3FL, United Kingdom

9 \* Corresponding author: [helen.alexander@ed.ac.uk](mailto:helen.alexander@ed.ac.uk)

10

11

12 **Abstract:**

13 A better understanding of how antibiotic exposure impacts the evolution of resistance is crucial for  
14 designing more sustainable treatment strategies. The conventional approach to relating antibiotic  
15 dose to resistance evolution within a bacterial population is to measure the range of concentrations  
16 over which resistant strain(s) are selectively favoured over a sensitive strain – the “mutant selection  
17 window”. Here, we instead investigate how antibiotic concentration impacts the initial  
18 establishment of resistance from single cells, mimicking the clonal expansion of a resistant lineage  
19 following mutation or horizontal gene transfer. Using two *Pseudomonas aeruginosa* strains carrying  
20 distinct resistance plasmids, we show that single resistant cells have <5% probability of outgrowth at  
21 antibiotic concentrations as low as  $1/8^{\text{th}}$  of the resistant strain’s minimum inhibitory concentration.  
22 This low probability of establishment is due to detrimental effects of antibiotics on resistant cells,  
23 coupled with the inherently stochastic nature of cell division and death on the single-cell level, which  
24 leads to loss of many nascent resistant lineages. Our findings suggest that moderate doses of  
25 antibiotics, within the traditional mutant selection window, may be more effective at preventing *de*  
26 *novo* emergence of resistance than predicted by deterministic approaches.

27

28 **Keywords:** antimicrobial resistance, *Pseudomonas aeruginosa*, minimum inhibitory concentration  
29 (MIC), inoculum effect, mathematical model, extinction probability, demographic stochasticity,  
30 evolutionary rescue

31

32 **Significance statement:**

33 The emergence of antibiotic resistance poses a critical threat to the efficacy of antibiotic treatments.  
34 A resistant bacterial population must originally arise from a single cell that mutates or acquires a  
35 resistance gene. This single cell may, by chance, fail to successfully reproduce before it dies, leading  
36 to loss of the nascent resistant lineage. Here we show that antibiotic concentrations that selectively  
37 favour resistance are nonetheless sufficient to reduce the chance of outgrowth from a single cell to a  
38 very low probability. Our findings suggest that lower antibiotic concentrations than previously  
39 thought may be sufficient to prevent, with high probability, emergence of resistance from single  
40 cells.

## 41 Introduction

42

43 Antibiotics have had a huge impact on human health by reducing the burden associated with  
44 bacterial infections, and the use of antibiotics now underpins many areas of medicine.  
45 Unfortunately, antibiotic treatment is also associated with the evolution of resistance [1], resulting  
46 in poorer patient outcomes [2]. A better understanding of how antibiotic dosing affects resistance  
47 evolution could aid the design of more effective treatment strategies that suppress pathogenic  
48 bacteria without driving the emergence of resistance.

49

50 To date, *in vitro* work addressing how antibiotics affect evolution of resistance has focused on  
51 identifying the range of antibiotic concentrations at which resistant mutants are selectively favoured  
52 by antibiotic treatment, known as the “mutant selection window” (MSW) [3, 4, 5, 6]. Here we will  
53 refer to any strain with reduced susceptibility relative to a wild-type (“sensitive”) strain simply as  
54 “resistant”, as is common in evolutionary microbiology literature (e.g. [7, 8, 9]), as opposed to  
55 defining resistance with respect to clinical breakpoints. Originally, the lower boundary of the MSW  
56 was approximated by the minimum inhibitory concentration of the sensitive strain ( $MIC_S$ ) [3, 4, 5, 6],  
57 i.e. the lowest antibiotic concentration that abolishes its growth in a standardized assay (such as  
58 [10]). However, more recent work has emphasized that a resistant strain can be selectively favoured  
59 down to a minimal selective concentration (MSC) that is often well below  $MIC_S$  [11, 12, 13, 7, 8]. The  
60 upper boundary of the MSW is conventionally defined by the lowest antibiotic concentration that  
61 prevents growth of all mutant subpopulations [3, 4]. This upper bound is often equated with the  
62 minimum inhibitory concentration of the most resistant single-point mutant [5] or of a specific  
63 resistant strain under study [13, 8], which we denote  $MIC_R$ . The MSW therefore ranges between  
64 antibiotic concentrations that are so low that they are unlikely to have any clinical benefit (below  
65  $MIC_S$ ) and very high concentrations (up to  $MIC_R$ ) that may be difficult to achieve in practice because  
66 of physiological constraints on the accumulation of antibiotics in tissues (pharmacokinetics) and  
67 toxic side-effects of antibiotics [14, 15].

68

69 Selection operates efficiently when both sensitive and resistant populations are large, resulting in an  
70 increase in frequency of the fitter strain in an antibiotic dose-dependent manner. Correspondingly,  
71 the mutant selection window is typically measured by direct competition between large numbers of  
72 cells (typically  $>10^4$  colony-forming units, CFU) of both resistant and sensitive strains across a  
73 gradient of antibiotic concentrations (e.g. [13]). This provides a powerful approach to measure the  
74 impact of antibiotic dose on selection for established resistant strains, i.e. those that are already

75 reasonably prevalent. However, *de novo* emergence of resistant strains, when not initially present,  
76 should be subject to stochastic processes [16] that are not reflected by the MSW, nor captured by  
77 this experimental design. First, resistance must stochastically arise in a sensitive cell by mutation, or  
78 by acquisition of a resistance gene through horizontal gene transfer. Next, the single resistant cell  
79 thus generated must survive and successfully divide to produce daughter cells that likewise survive,  
80 and so on to generate a large number of resistant descendant cells. The latter process, which we will  
81 refer to throughout as “establishment” of resistance [16], will be our focus here. Importantly, due to  
82 the stochastic nature of cell divisions and deaths on the individual level, establishment is not  
83 guaranteed, even under conditions in which the resistant strain is selectively favoured [17].  
84 Moreover, if antibiotics even partially inhibit the resistant strain below its  $MIC_R$ , the chance that a  
85 resistant cell dies or fails to divide, and thus the risk that a resistant lineage is stochastically lost,  
86 should increase in the presence of antibiotics at concentrations within the MSW. Despite the  
87 substantial body of work addressing the selection of resistance, very little work has addressed the  
88 stochastic establishment phase (see however [18, 19, 20]).

89  
90 We set out to quantify stochastic establishment using *in vitro* experiments with *Pseudomonas*  
91 *aeruginosa*, an important opportunistic pathogen that evolves resistance at an exceptionally high  
92 rate during infections [1, 21]. To isolate the establishment phase, we inoculated hundreds of  
93 cultures, each with a very small number of resistant cells (on average, approx. 1-3), and assessed  
94 culture growth. We tested two strains carrying non-conjugative plasmids (Rms149 and PAMBL2) that  
95 confer resistance to streptomycin and meropenem, respectively, across a gradient of the  
96 corresponding antibiotic concentrations within the MSW. By fitting mathematical models to these  
97 data, we estimated the probability of establishment, i.e. of detectable culture growth due to clonal  
98 expansion from a single resistant cell, as a function of antibiotic concentration. Our key finding is  
99 that the establishment probability of resistant cells drastically declines at concentrations well below  
100 the MIC of the resistant strain, reaching  $\lesssim 5\%$  at  $1/8^{\text{th}}$  of  $MIC_R$  in both systems. These concentrations  
101 lie well above the corresponding MIC values of the sensitive strain and within the conventional  
102 mutant selection window. Our results highlight that antibiotic selection pressure is not a sufficient  
103 condition for *de novo* emergence of resistance starting from single cells. Accounting for the  
104 demographic stochasticity inherent to the outgrowth of mutant lineages substantially narrows the  
105 window of concentrations at which resistant mutants are likely to establish, suggesting that  
106 moderate antibiotic dosing may be an effective strategy to prevent the emergence of resistance.

107

108

## 109 **Results**

110

### 111 ***Establishment of resistance is inhibited by sub-MIC<sub>R</sub> antibiotic concentrations***

112

113 To elucidate the direct impact of antibiotics on resistant cells, we first investigated establishment of  
114 a resistant strain in the absence of a sensitive strain. We first focused on the streptomycin-resistant  
115 PA01:Rms149 strain. To estimate its probability of establishment, defined as outgrowth of a  
116 detectable (i.e. large) population from a single cell, we conducted large-scale “seeding” experiments  
117 (see also [20]). In this assay (**Fig. 1**), a highly diluted overnight culture of the resistant strain is  
118 inoculated into fresh media in a large number of replicate cultures. The high dilution factors yield  
119 average inoculum sizes of <1 to ~3 cells per culture. Importantly, however, the actual number of  
120 cells inoculated into each replicate culture is random, and can be described by a Poisson distribution  
121 (**SI Appendix, Fig. S1**). One implication of this protocol is that many cultures are not inoculated with  
122 any cells, while others receive more than one cell; our modelling approach will account for this  
123 variation statistically. We inoculated parallel replicate cultures in streptomycin-free media and at a  
124 range of streptomycin concentrations below the MIC of the resistant strain, denoted MIC<sub>R</sub>, as  
125 measured using standard protocols [10] (**SI Appendix, Table S1**). We then scored the number of  
126 replicate cultures showing growth based on reaching a threshold optical density (OD) of 0.1 within 3  
127 days post-inoculation.

128

129 A culture could fail to grow either because the inoculum did not contain any cells, or because every  
130 cell in the inoculum failed to give rise to a surviving lineage. To infer the probability that a single cell  
131 yields detectable population growth (i.e. the per-cell establishment probability), we fit a  
132 mathematical model, accounting for both the random inoculum size and demographic stochasticity,  
133 to the observed number of replicate cultures showing growth (**Materials and Methods**). All  
134 probabilities are normalized by the result in streptomycin-free media, which corresponds to scaling  
135 inoculum size by the mean number of cells that establish in benign conditions (which we call the  
136 “effective” inoculum size). Thus, relative establishment probability  $\tilde{p}_c$  equals one by definition in  
137 streptomycin-free conditions, while we expect  $\tilde{p}_c \leq 1$  with streptomycin treatment; however,  
138 values larger than one can arise due to sampling error.

139

140 Our seeding experiments revealed that the probability of establishment of a single resistant cell  
141 declines with increasing streptomycin concentration (**Fig. 2** and **SI Appendix, Table S2**). While  
142 exposure to the lowest tested concentrations of streptomycin (up to 1/32 x MIC<sub>R</sub>) had no detectable

143 impact on establishment,  $1/16 \times \text{MIC}_R$  was already sufficient for significant declines, to  $\tilde{p}_c$  of 55-73%  
144 (maximum likelihood estimates in two independent experiments). At  $1/8 \times \text{MIC}_R$ ,  $\tilde{p}_c$  dropped to just  
145 3-5%. These results suggest that a *de novo* resistant mutant would only rarely establish at antibiotic  
146 concentrations that are well below its  $\text{MIC}_R$ , i.e. within the MSW.

147

148

#### 149 ***MIC depends on inoculum size***

150

151 The frequent failure of the resistant strain to grow in our seeding experiments at concentrations well  
152 below its MIC is, at face value, surprising. We hypothesized that these results could be explained by  
153 the difference in inoculum size between these assays. Specifically, standard MIC values are assessed  
154 from an inoculation density of  $5 \times 10^5$  CFU/mL [10], which corresponds to an inoculum size of  $10^5$  CFU  
155 per 200 $\mu$ l culture on our microtitre plates. In contrast, our seeding experiments used an inoculum  
156 size on the order of 1 CFU per culture. MIC for many antibiotics has been observed to increase with  
157 higher-than-standard inoculation densities (CFU/ml) [22, 23, 24] which corresponds to higher  
158 absolute inoculum size (CFU) for a fixed culture volume. Although less well-explored, it has also  
159 occasionally been noted that MIC can decrease when lower absolute inoculum sizes are used [25,  
160 26].

161

162 To test the hypothesis that inoculum size influences MIC in the present system, we conducted a  
163 modified MIC assay using the PA01:Rms149 strain with inoculum sizes ranging over three orders of  
164 magnitude, from approximately  $10^2$  to  $10^5$  CFU per culture (corresponding to inoculation densities of  
165  $5 \times 10^2$  up to the standard  $5 \times 10^5$  CFU/ml). We found that MIC indeed increases with inoculum size  
166 (**Fig. 3a**). This pattern arises regardless of whether growth is scored at 20h, as per the standard MIC  
167 assay protocol [10], or up to 3d post-inoculation, as in our seeding experiments, although the  
168 number of cultures showing detectable growth, and thus the measured MIC, tends to increase over  
169 time (**SI Appendix, Fig. S2**).

170

171 Since all cultures contained the same volume in the above experiment, this pattern could be due to  
172 changes either in absolute inoculum size (i.e. CFU) or in inoculation density (i.e. CFU per unit  
173 volume). These two possibilities are not typically distinguished in the literature; however, they lead  
174 to distinct interpretations. If demographic stochasticity is the dominant force, we expect absolute  
175 numbers to matter, whereas if interactions among cells (e.g. competition or cooperation) affect  
176 establishment, cell density per unit volume could be more important. To disentangle these two

177 factors, we repeated the MIC assay co-varying inoculation density and culture volume. This  
178 experiment confirmed that absolute inoculum size has a strong effect on MIC. In contrast,  
179 inoculation density per unit volume does not have a significant effect within the range that we  
180 tested, after controlling for absolute cell numbers (**SI Appendix, Fig. S3**).

181

182

183 ***Population growth can be explained by an independent chance of each cell to establish***

184

185 Taken together, our seeding experiments and MIC assays reveal that the absolute number of cells in  
186 the inoculum has a strong effect on whether the culture eventually shows detectable growth. The  
187 simplest explanation for this result is that population growth can be attributed to the stochastic  
188 outgrowth of one or more lineages, each initiated by a single cell in the inoculum, acting  
189 independently. This independence assumption yields a “null model” that mathematically describes  
190 the effect of inoculum size on the probability of outgrowth of a detectable population (**Materials  
191 and Methods, Eqn. 1**). Here the probability of establishment of each cell in the inoculum ( $\tilde{p}_c$ ) is a  
192 scaling parameter, which does not depend on inoculum size. Note that this null model would not  
193 hold if interactions among cells substantially influenced their chances of successful replication. For  
194 example, if cells secrete an enzyme that breaks down an antibiotic extracellularly, then the  
195 establishment probability of each cell could increase with inoculum size. On the other hand, if cells  
196 compete for limiting resources or secrete toxins, the per-cell establishment probability could  
197 decrease with inoculum size.

198

199 To formally test the null model, we again conducted seeding experiments with the PA01:Rms149  
200 strain, but now using many different inoculum sizes, spanning approximately three orders of  
201 magnitude. We tested two streptomycin concentrations ( $1/16$  and  $1/8 \times \text{MIC}_R$ ) for which growth  
202 often failed from a single cell, but succeeded from standard inoculum size in MIC assays. In parallel,  
203 we tested growth in streptomycin-free media in order to estimate the effective mean inoculum size  
204 (**SI Appendix, Fig. S4**). This left one free parameter, the per-cell relative establishment probability  
205 ( $\tilde{p}_c$ ), to fit at each streptomycin concentration.

206

207 We found good agreement between the null model and our experimental data at all tested  
208 streptomycin concentrations, consistent with the hypothesis that cells establish independently  
209 (main experiment, **Fig. 3b**, and repeat experiments, **SI Appendix, Fig. S5**). More precisely, the null  
210 model did not show significant deviance from the observed proportion of populations that grew

211 (according to the likelihood ratio test), and thus we accept it as a parsimonious explanation for the  
212 data. Furthermore, we obtain estimates of relative establishment probability,  $\tilde{p}_c$ , at  $1/16$  and  $1/8 \times$   
213  $MIC_R$  similar to those from the previous seeding experiments (**SI Appendix, Table S2**).

214

215 To summarize, the probability of culture growth at any given streptomycin concentration depends  
216 on inoculum size, according to a simple quantitative relationship. Our experimental data are  
217 consistent with a simple model of cells behaving independently, such that a fixed per-cell  
218 establishment probability can explain our growth data across inoculum sizes. That is, cells are not  
219 “more susceptible” to streptomycin at lower inoculum sizes, but rather, culture growth is less likely  
220 to be observed simply because fewer cells are available to establish, and not all cells succeed. In  
221 turn, the minimal concentration of streptomycin required to prevent growth in some proportion of  
222 replicate cultures (i.e. the observed MIC) increases with inoculum size.

223

224

#### 225 ***Sub- $MIC_R$ streptomycin concentrations induce resistant cell death and extend lag phase***

226

227 We hypothesized that resistant cells sometimes failed to establish in our seeding experiments  
228 because exposure to streptomycin compromised cell division rate and/or viability. As a simple test  
229 of this idea, we measured the relative abundance of dead cells in cultures of the resistant strain  
230 grown at sub- $MIC_R$  concentrations of streptomycin. We found that the fraction of dead cells after 7h  
231 of treatment, as determined by propidium iodide staining, increased from an average of 3-4% in  
232 streptomycin-free conditions to >20% at  $1/8 \times MIC_R$  streptomycin (**Fig. 4a** and **SI Appendix, Fig. S6**  
233 and **Table S3**). Note that this is a conservative measure of cell death, because this assay only detects  
234 cells that have compromised membrane permeability, and not, for example, cells that have already  
235 lysed. Furthermore, this assay provides only a snapshot in time.

236

237 To gain further insight into how sub- $MIC_R$  streptomycin impacts the population dynamics of the  
238 resistant strain, we quantified viable cell density over the first few hours after inoculation into  
239 streptomycin-containing media. Cultures were inoculated with approximately 100 cells in this  
240 experiment, to ensure that cell numbers were low enough for demographic stochasticity to be  
241 relevant, yet large enough to be detectable using conventional plating methods.

242

243 We found that streptomycin treatment has a significant effect on the growth of resistant cultures  
244 (ANOVA, main effect:  $p < 2e-16$ ), and this effect varies over time (ANOVA, interaction term:  $p < 2e-$



245 16; **Fig. 4b** and **SI Appendix, Fig. S7**). Following inoculation, cultures exhibited a lag phase of  
246 approximately 2 hours. Control cultures in streptomycin-free media then began to grow  
247 exponentially. The lowest tested concentration of streptomycin ( $1/32 \times \text{MIC}_R$ ) had no significant  
248 effect on these dynamics (Dunnett's test:  $p=0.87$ ); however,  $1/16 \times \text{MIC}_R$  was already sufficient to  
249 slow growth ( $p=4e-4$ ). Nonetheless, all replicate cultures ( $n=48$  per concentration) eventually grew,  
250 as detected by OD. Meanwhile, higher doses of streptomycin ( $1/8 \times$  or  $1/4 \times \text{MIC}_R$ ) had dramatic  
251 effects on growth dynamics ( $p < 1e-4$ ), with cultures exhibiting an extended lag phase of at least 7-8  
252 hours, in which viable cell density initially declined. After further incubation (up to 3 days), 25% of  
253 cultures (15/60) exposed to  $1/8 \times \text{MIC}_R$  eventually showed growth, while the remaining 75% (45/60)  
254 failed to reach detectable OD. At  $1/4 \times \text{MIC}_R$ , no viable cells were detected in most cultures from 4h  
255 on, and only  $1/60$  cultures reached detectable OD within 3 days.

256

257 In summary, sub- $\text{MIC}_R$  streptomycin treatment has the effect of extending the lag phase, before  
258 cultures eventually either grow to saturation or die out. Failure to grow can be explained by  
259 significantly elevated cell death rates beginning at  $1/16 \times \text{MIC}_R$ , which can lead to stochastic loss of  
260 initially small populations.

261

262

263 ***Stochastic establishment is recapitulated for a clinically relevant antibiotic and resistance plasmid***

264

265 If the frequent failure of resistant cells to establish surviving populations at antibiotic doses well  
266 below their MIC is a general phenomenon, it would have important implications for understanding  
267 the emergence of resistance during antibiotic treatment. To confirm that our result was not driven  
268 by the specific choice of antibiotic or resistance mechanism, we repeated the key seeding  
269 experiment using a *P. aeruginosa* PA01 strain carrying a recently isolated multi-drug resistance  
270 plasmid, PAMBL2 [27, 28], that confers resistance to meropenem through the *bla*<sub>vim-1</sub>  
271 carbapenemase. Carbapenems are an important treatment option for serious infections caused by  
272 gram-negative bacterial pathogens, and resistance is of current clinical concern [29, 30];  
273 carbapenem-resistant *P. aeruginosa* has been identified as a “critical priority” for new antibiotic  
274 development by the WHO [31]. In agreement with our previous findings, the establishment  
275 probability of PA01:PAMBL2 cells declined at concentrations of meropenem well below this strain's  
276  $\text{MIC}_R$  (**SI Appendix, Table S1**), reaching ~5% at  $1/8 \times \text{MIC}_R$ , while no establishment was observed at  
277  $1/4 \times \text{MIC}_R$  (**Fig. 5** and **SI Appendix, Table S4**). This result highlights that the stochastic loss of  
278 resistant cells is not unique to our primary model system of PA01:Rms149 in streptomycin.

279

280

281 ***The sensitive population modulates probability of establishment of resistant cells***

282

283 So far, we focused on the direct effects of antibiotics on resistant cells by conducting experiments  
284 with monocultures of resistant strains. However, *de novo* resistance will actually arise within a  
285 sensitive population, by mutation or transfer of a mobile genetic element into a sensitive cell.

286 Moreover, antibiotic treatment will only begin in clinical settings once the total pathogen population  
287 is large enough to cause symptoms. We therefore asked whether the presence of a large sensitive  
288 population affects the establishment of initially rare resistant cells during antibiotic treatment,  
289 returning to the interaction between PA01 (sensitive) and PA01:Rms149 (streptomycin-resistant) as  
290 a model system.

291

292 We expect the sensitive population and the antibiotic to have interacting effects on establishment of  
293 resistance. In particular, at sufficiently low antibiotic concentrations, a sensitive strain is generally  
294 expected to outcompete a resistant strain due to the fitness cost associated with resistance [13, 7,  
295 8]. We confirmed this expectation in our experimental system using a standard competition assay,  
296 where both strains start from reasonably large inoculum sizes (**SI Appendix, Fig. S8-S10 and Table**  
297 **S5**). We found that the sensitive strain is favoured up to a minimum selective concentration (MSC)  
298 between 1-2  $\mu\text{g/ml}$  streptomycin (equivalent to  $1/32 - 1/16 \times \text{MIC}_S$ , or  $1/2048 - 1/1024 \times \text{MIC}_R$ ), in  
299 agreement with previous results for these strains [32]. We hypothesized that competition from the  
300 sensitive strain would prevent establishment of resistance at streptomycin concentrations below the  
301 MSC.

302

303 As a simple test of this idea, we modified the seeding experiment to inoculate very few resistant  
304 cells into a large sensitive population. Since bacterial densities in clinical infections can vary widely  
305 [9, 33], we inoculated the sensitive strain at two different densities: approximately  $5 \times 10^5$  CFU/ml  
306 (as in a standard MIC assay; labelled “low”) and  $5 \times 10^7$  CFU/ml (labelled “high”). The resistant strain  
307 was seeded, with mean inoculum size on the order of one cell per culture, immediately thereafter.

308

309 As hypothesized, we found that the presence of the sensitive population (at either density)  
310 abolished establishment of resistant cells in the absence of streptomycin (**Fig. 6 and SI Appendix,**  
311 **Fig. S11 and Table S6**). Meanwhile, at streptomycin concentrations above the MSC ( $1/256$  to  $1/8 \times$   
312  $\text{MIC}_R$ , or  $1/4$  to  $8 \times \text{MIC}_S$ ), adding the sensitive population at low density had a negligible effect on

313 the probability of establishment of resistant cells. At high density, the sensitive population also had  
314 negligible effects on establishment of resistance at streptomycin concentrations up to  $1/16 \times \text{MIC}_R$  ( $4$   
315  $\times \text{MIC}_S$ ). However, at  $1/8 \times \text{MIC}_R$  ( $8 \times \text{MIC}_S$ ), the presence of a high-density sensitive population  
316 increased the establishment probability from near zero to 65%. To confirm and further probe the  
317 extent of this apparent protective effect, we repeated the experiment over a higher range of  
318 streptomycin concentrations. The boost in establishment probability was repeatable and highly  
319 significant at  $1/8 \times \text{MIC}_R$  (Wilcoxon rank-sum test, high- vs. zero or low-density sensitive:  $p < 5e-8$  in  
320 both experiments). However, at  $1/4 \times \text{MIC}_R$  ( $16 \times \text{MIC}_S$ ), an apparent slight boost in establishment  
321 probability was non-significant, and by  $1/2 \times \text{MIC}_R$  ( $32 \times \text{MIC}_S$ ) the effect was abolished. Thus, a  
322 sufficiently dense sensitive population can extend the range of streptomycin concentrations at  
323 which the resistant strain is likely to emerge, but does not change the qualitative pattern of  
324 stochastic establishment.

325

326

## 327 Discussion

328

329 In order for resistance to emerge *de novo*, not only must a resistance gene arise in a bacterial  
330 population by mutation or horizontal gene transfer; this first resistant cell must also successfully  
331 expand to form a large population. Since any individual cell may fail to replicate, particularly in  
332 challenging environmental conditions, the expansion of newly arisen resistant strains is not  
333 guaranteed. Our key finding is that demographic stochasticity imposes a significant barrier to the  
334 emergence of resistance in the presence of antibiotics at concentrations within the mutant selection  
335 window.

336

337 We empirically demonstrated the importance of stochasticity with a simple “seeding experiment”  
338 mimicking the growth of clonal resistant lineages founded by a single cell. First, to assess the direct  
339 impact of antibiotics, we inoculated fresh antibiotic-containing media with approximately one  
340 resistant cell per replicate culture and quantified the per-cell probability of establishing a detectable  
341 population. Strikingly, this establishment probability dropped off at concentrations well below the  
342 MIC of the corresponding resistant strain ( $\text{MIC}_R$ ). For example, the establishment probability of  
343 PA01:Rms149 was significantly reduced by streptomycin concentrations as low as  $1/16 \times \text{MIC}_R$ , and  
344 dropped to  $<5\%$  at  $1/8 \times \text{MIC}_R$  (**Fig. 2**). Resistant cells failed to establish viable populations because of  
345 the toxic effects of exposure to sub- $\text{MIC}_R$  concentrations of antibiotics (**Fig. 4**) coupled with the  
346 inherently stochastic nature of individual cell death and division. Importantly, we were able to

347 replicate our key finding of frequent stochastic loss using a different, meropenem-resistant strain  
348 (PA01:PAMBL2; **Fig. 5**). This demonstrated that our results are not limited to a particular model  
349 system, but are also relevant to bacterial pathogens of clinical concern: carbapenem-resistant *P.*  
350 *aeruginosa* is considered by the WHO to be of “critical priority” for antibiotic development [31].

351

352 In clinical settings, antibiotic treatment will typically begin only when the total bacterial population is  
353 large enough to cause symptoms. Assuming resistance has not been transmitted, this population will  
354 be predominantly antibiotic-sensitive, and *de novo* mutation or acquisition of a mobile element  
355 conferring resistance will occur within a sensitive cell. We therefore next asked how the presence of  
356 a large sensitive population would combine with the above effects of antibiotics to shape the  
357 emergence of resistance from this first cell, again in the streptomycin model system. As predicted  
358 from standard competition assays, emergence of resistance was abolished in the absence of  
359 antibiotics (**Fig. 6**), presumably due to competitive suppression by the sensitive strain [8]. More  
360 interestingly, a sufficiently dense sensitive population (inoculated at  $\sim 5 \times 10^7$  CFU/ml here) was able  
361 to shift the range of concentrations at which resistance established upwards by approximately two-  
362 fold. We speculate that this apparent protection is due to sensitive cells absorbing antibiotics, thus  
363 lowering their concentration in the media [23, 34], despite these concentrations being high enough  
364 to cause decline of the sensitive population (i.e.  $> \text{MIC}_S$ ). *A priori*, one may not expect resistant cells  
365 to “need” protection at sub- $\text{MIC}_R$  antibiotic concentrations. However, in the stochastic regime of  
366 establishment, any increase in the probability of individual cells surviving and dividing can make a  
367 qualitative difference to the fate of a rare resistant lineage. This protective effect depends on  
368 bacterial density at the time of treatment, within a realistic range for some bacterial infections [9,  
369 33]: when the sensitive population was inoculated at 100-fold lower density ( $\sim 5 \times 10^5$  CFU/ml),  
370 protection was not apparent. We emphasize that although these experiments provide an initial  
371 proof of concept, a complete investigation of the interacting effects of sensitive population density,  
372 antibiotic dose and timing remains an important direction for future work. Importantly, however,  
373 our main message continues to hold even in the more realistic context of resistance arising within a  
374 sensitive population: stochastic loss of resistant cells is frequent at antibiotic concentrations within  
375 the MSW.

376

377 The failure of resistant cells to establish successful lineages at concentrations well below the  $\text{MIC}_R$   
378 shows a clear disconnect between antibiotic susceptibility of individual cells and populations. To  
379 explain this effect rigorously, we quantified the probability of outgrowth of a detectable population  
380 at a fixed streptomycin concentration, starting from inoculum sizes spanning three orders of

381 magnitude. We fit these data to a mathematical model relating inoculum size to probability of  
382 population growth, under the hypothesis that each cell in the inoculum behaves independently (**Eqn.**  
383 **1**). This simple stochastic model, with a constant per-cell probability of establishment ( $\tilde{p}_c$ ), provides  
384 a good explanation for inoculum size-dependent population growth in PA01:Rms149 (**Fig. 3b**). In this  
385 model, individual cells are not “more susceptible” to antibiotic in smaller populations. Instead, the  
386 cumulative effect of many cells, each with a small chance of establishment (e.g. <5% at  $1/8 \times \text{MIC}_R$  in  
387 this system), virtually guarantees population growth from a sufficiently large inoculum size,  
388 reconciling our results with the standard definition of the MIC. We thus emphasize that MIC is not  
389 an innate property of a cell or strain, but rather an emergent property of a population of cells. We  
390 also note that the inoculum size effect on MIC that we found here – a purely stochastic phenomenon  
391 arising at low absolute numbers (CFU) – is distinct from the inoculum size effect already widely  
392 recognized in the literature, which is seen at high cell density (CFU/ml) and attributed to various  
393 density-dependent mechanisms, such as titration or enzymatic inactivation of antibiotics [35, 36, 24,  
394 37, 32, 23, 38]. Although there are hints of the former absolute-number effect in earlier studies [25,  
395 26], to our knowledge we are the first to provide a rigorous explanation in terms of stochastic  
396 population dynamics.

397  
398 The good fit of the null model, in which every cell has an equal probability of establishment, at first  
399 seems to be at odds with the growing recognition that bacteria exhibit phenotypic heterogeneity,  
400 which could affect individual cells’ susceptibility to antibiotics [39, 40]. Indeed, it is entirely possible  
401 that the resistant cells that successfully established in our experiments were those with a particular  
402 metabolic state or gene expression level. However, this variability among cells would have no effect  
403 on our experimental outcomes: under our mathematical model (**Eqn. 1**), the probability of observing  
404 growth in a given number of replicate cultures is the same for any degree of cell-to-cell variation  
405 around a fixed mean, assuming the susceptibilities of cells within an inoculum are independent from  
406 one another (**Suppl. Text**, section 10.1). Thus, the establishment probability that we infer empirically  
407 should more accurately be interpreted as a mean among cells.

408  
409 Although the role of demographic stochasticity in the fate of *de novo* mutations has long been  
410 recognized in theoretical population genetics, until very recently it had never been addressed  
411 empirically [17]. Our study joins a small handful of others that have now experimentally quantified  
412 establishment probability from single cells [41, 18, 42, 19], including two [18, 19] investigating  
413 establishment of bacterial cells in the presence of antibiotics, using different methods to ours (see  
414 **Suppl. Text**, section 10.2, for a more detailed comparison). Bacterial evolution of resistance to

415 antibiotic treatment is also a prime example of the more general phenomenon of evolutionary  
416 rescue, whereby adaptation prevents extinction of populations facing severe environmental change  
417 [43]. Experiments quantifying the probability of rescue in initially large, but declining, populations  
418 were pioneered around a decade ago in yeast exposed to high salt concentrations [44]. More recent  
419 work clarified the quantitative relationship between initial population size and probability of rescue  
420 [45], coinciding with our **Eqn. 1** (see **Suppl. Text**, section 10.2, for further discussion). More broadly,  
421 the concepts and statistical methods developed here are applicable to a variety of situations where  
422 growth depends on success of rare cells and is thus highly stochastic, for instance the establishment  
423 of productive infection in a host following pathogen transmission [46], the onset of invasive bacterial  
424 infections [47], the outgrowth of bacteria in food products from small initial contaminants [48], or  
425 the establishment of metastases from cancerous tumours [49].

426  
427 In summary, our study highlights the stochastic nature of *de novo* emergence of antibiotic  
428 resistance. In a practical sense, this stochasticity implies that to accurately assess the risk of  
429 resistance emerging, we must evaluate not only mutation rates, but also the probability that  
430 resistant mutants escape extinction when rare [9], which will depend on the antibiotic dosing  
431 regimen. Our results caution against the naïve use of the mutant selection window (MSW) for this  
432 purpose. While a positive selection coefficient is a necessary condition for resistance to outcompete  
433 an initially prevalent sensitive strain, it does not guarantee emergence when rare; indeed, we  
434 showed that single resistant cells are frequently lost at antibiotic concentrations well within the  
435 MSW. Thus, our findings suggest that moderate antibiotic doses may be more effective than  
436 previously thought at preventing *de novo* emergence of resistance, especially in infections where  
437 total pathogen density is relatively low. For antibiotics that have mutagenic effects, the chance of a  
438 resistant lineage arising in the first place might also be reduced at lower doses ( [50]; see however  
439 [51]). Furthermore, use of lower antibiotic doses could reduce both adverse effects on patients and  
440 release of antibiotics into the environment [52].

441

442

## 443 **Materials and Methods**

444

445 Further details of experimental protocols, data processing, mathematical models and statistical  
446 methods are provided in the **SI Appendix, Suppl. Text**.

447

448 ***Bacterial strains, media, and culture conditions***

449

450 Bacterial strains: The majority of our experiments, in streptomycin, were conducted with a set of  
451 *Pseudomonas aeruginosa* PA01 strains studied previously [32]. The streptomycin-sensitive and -  
452 resistant strains are chromosomally isogenic, while resistant strains additionally carry the clinically  
453 derived, non-conjugative plasmid Rms149 [53], which is stably maintained in PA01 at approximately  
454 two copies per cell [54]. Streptomycin resistance is conferred by the *aadA5* gene on Rms149, which  
455 codes for an enzyme that adenylates streptomycin [55]. Both plasmid carriers (resistant) and non-  
456 carriers (sensitive) are available with either YFP or DsRed chromosomal fluorescent markers or with  
457 no marker [32]. The live-dead staining experiment was conducted with the unlabelled resistant  
458 strain. All other experiments reported in the main text were conducted with the YFP-labelled  
459 resistant strain and, where applicable, the DsRed-labelled sensitive strain. We chose this pairing  
460 because YFP provides a stronger signal, facilitating detection of the resistant strain in mixed cultures.  
461 Previous work with these strains suggests that the two fluorescent labels have similar fitness effects  
462 [32], and we confirmed that the label had no substantive effect on the MIC values of the sensitive  
463 strain (**Suppl. Text**, section 2.1). For the seeding experiment in meropenem, we transformed the  
464 plasmid PAMBL2 into the same PA01-YFP background (**Suppl. Text**, section 1). This plasmid, isolated  
465 in 2007 from a patient in a Spanish hospital [27], confers meropenem resistance through three  
466 copies of the *bla<sub>VIM-1</sub>* gene, which codes for a metallo-beta-lactamase [27, 28]. It is non-conjugative  
467 [28] and stably maintained in PA01 at an average of 2-3 copies/cell [54]. MIC values of all relevant  
468 strain-antibiotic pairs are reported in **Table S1**.

469

470 Media and antibiotics: We cultured bacteria in LB broth containing 5g/L NaCl (Sigma-Aldrich, product  
471 no. L3022). To assess colony-forming units, we plated on LB Agar, Vegitone, containing 5g/L NaCl  
472 and 15g/L agar (Sigma-Aldrich, product no. 19344). Streptomycin was prepared from streptomycin  
473 sulfate salt (Sigma-Aldrich, product no. S6501) and meropenem was prepared from meropenem  
474 trihydrate (Santa Cruz Biotechnology, Inc., product no. SC-485799). Stocks prepared in water were  
475 stored according to supplier directions and added to media on the day of experiments. When high  
476 antibiotic concentrations were required, stocks were instead prepared directly in LB on the day of  
477 experiments to avoid excessive dilution of the media with water. Bacterial cultures were diluted in  
478 phosphate buffered saline (PBS) prepared from tablets (Sigma-Aldrich product no. P4417).  
479 Treatment cultures were set up with 90% media plus 10% inoculating culture by volume; thus, the  
480 final concentrations of LB and antibiotics in the treatments are 90% of the prepared media values  
481 denoted on plots.

482

483 Culture conditions: All cultures were incubated at 37°C, shaking at 225rpm. Overnight cultures were  
484 inoculated directly from freezer stocks into 2ml of LB in 14ml culture tubes and incubated for  
485 approximately 16h. Overnight cultures were then diluted in PBS and used to inoculate treatment  
486 plates. Unless otherwise noted, experimental treatments were conducted in 200µl cultures in flat-  
487 bottom 96-well microtitre plates.

488  
489 Scoring culture growth: In all experiments, we evaluated culture growth by measuring optical  
490 density (OD<sub>595</sub>) using a BioTek Synergy 2 plate reader, at room temperature. Lids on microtitre plates  
491 were briefly removed in a non-sterile environment for the reading; comparison to controls mock-  
492 inoculated with PBS indicated that contamination was rare (see **Suppl. Text** for detailed  
493 quantification in each experiment). We set a threshold of OD<sub>595</sub> > 0.1 to score as growth, whereas  
494 background OD in media-only controls was typically below 0.05. Final readings at 3d post-inoculation  
495 were used for data analysis unless otherwise noted. By this time, growth had typically stabilized,  
496 with OD much higher than the threshold.

497

#### 498 ***MIC assays***

499

500 Standard MIC values for all applicable strain-antibiotic pairs (i.e. resistant Rms149-carrier against  
501 streptomycin; resistant PAMBL2-carrier against meropenem; sensitive non-carrier against both  
502 antibiotics) were determined under our culture conditions using the broth microdilution method.  
503 Overnight cultures were diluted 10<sup>3</sup>-fold and inoculated into antibiotic-containing media at  
504 20µl/well on 96-well test plates. This dilution factor consistently yielded an inoculation density close  
505 to 5 x 10<sup>5</sup> CFU/ml, in accordance with standard protocol [10]; actual density was estimated by  
506 plating. Test plates were incubated and scored for growth at approximately 20h (as per standard  
507 protocol [10]), 2d, and 3d post-inoculation. For consistency with growth scoring in seeding  
508 experiments, the standard MIC values (MIC<sub>S</sub> and MIC<sub>R</sub>) used to scale antibiotic concentrations on  
509 plot axes are based on results at 3d. Consensus MIC values of all tested strain-antibiotic pairs, at  
510 both 20h and 3d, are reported in **Table S1**, with results of individual replicates reported in the **Suppl.**  
511 **Text**, section 2.1. For the YFP-labelled Rms149-carrying resistant strain, an additional MIC assay in  
512 streptomycin was conducted varying inoculum size (**Fig. 3a**). Here, inoculations were conducted with  
513 overnight culture diluted 10<sup>3</sup>-, 10<sup>4</sup>-, 10<sup>5</sup>-, and 10<sup>6</sup>-fold (see **Suppl. Text**, section 2.2 for details).

514

#### 515 ***Seeding experiments: resistant strains in isolation***

516



517 Experimental protocol: A highly diluted overnight culture of the YFP-labelled resistant strain  
518 (Rms149- or PAMBL2-carrier) was inoculated at 20 $\mu$ l/well into antibiotic-containing media on 96-  
519 well test plates. For experiments with PA01:Rms149 screening across many streptomycin  
520 concentrations (**Fig. 2**), we used three dilution factors ( $4 \times 10^7$ -,  $8 \times 10^7$ , and  $1.6 \times 10^8$ -fold), each to  
521 inoculate 96 replicate wells at each concentration. To test the null model of the inoculum size effect  
522 (**Fig. 4b**), we screened fewer streptomycin concentrations across a larger number of dilution factors  
523 (five in streptomycin-free conditions and six to ten in each streptomycin concentration), each with  
524 54 replicates. These dilution factors were chosen differently for each streptomycin concentration to  
525 capture the range over which the proportion of replicate cultures showing growth increased from  
526 near 0 to near 1. For the experiment with PA01:PAMBL2 in meropenem (**Fig. 5**), we used two  
527 dilution factors ( $5 \times 10^7$ - and  $2 \times 10^8$ -fold), each with 96 replicates per concentration. In all cases, test  
528 plates were incubated and scored for growth after approximately 1, 2, and 3d; for the null model  
529 test, incubation and readings were continued up to 5d to confirm stabilization of growth. See **Suppl.**  
530 **Text**, sections 4-5, for further details.

531  
532 Model fitting: The number of replicate cultures showing growth by 3d (or, additionally, by 5d for the  
533 null model test), at each inoculating dilution factor and antibiotic concentration, was used for  
534 subsequent model fitting. To estimate single-cell establishment probability and evaluate the null  
535 model of the inoculum size effect, likelihood-based methods were used to fit a stochastic model of  
536 population growth to these data (see **Mathematical model of establishment** below). In addition, to  
537 evaluate the effect of antibiotic concentration on establishment, generalized linear models were fit  
538 to data from the seeding experiments screening across streptomycin (**Fig. 2**) or meropenem (**Fig. 5**)  
539 concentrations. Using the built-in R function 'glm', growth data were treated as binomial, with  
540 inoculating dilution factor and antibiotic concentration taken as explanatory variables, applying the  
541 complementary log-log link function (**Suppl. Text**, section 12).

542

#### 543 ***Seeding experiments: resistant strain in presence of sensitive population***

544

545 Overnight culture of the DsRed-labelled PA01 sensitive strain was diluted 5-fold to obtain the “high  
546 density” inoculating culture, and (in the first experiment only) further to 500-fold to obtain the “low  
547 density” inoculating culture. Overnight culture of the YFP-labelled PA01:Rms149 resistant strain was  
548 diluted up to  $5 \times 10^7$ -fold and  $2 \times 10^8$ -fold. These cultures were inoculated as follows into media at  
549 various streptomycin concentrations on 96-well plates. Pure sensitive control cultures (24 replicates  
550 per test condition) were inoculated with 10 $\mu$ l/well of the appropriate diluted culture plus 10 $\mu$ l/well

551 PBS. “Blank” wells to serve as background fluorescence controls were inoculated with 20 $\mu$ l/well PBS.  
552 Seeding test plates were first inoculated with 10 $\mu$ l/well of either PBS (for pure resistant control  
553 cultures), low-density or high-density sensitive culture. The resistant strain was inoculated at  
554 10 $\mu$ l/well immediately thereafter (all sensitive and resistant culture inoculations were completed  
555 within an hour). Seeding was conducted with 30-60 replicates per test condition and resistant  
556 dilution factor (see **Suppl. Text**, section 6, for details). All test plates were then incubated as before,  
557 with optical density (OD<sub>595</sub>) and fluorescence (excitation: 500+/-27 nm; emission: 540+/-25 nm)  
558 measured at approximately 1, 2, and 3d post-inoculation. Among wells showing growth (OD>0.1),  
559 we considered the YFP-labelled resistant strain to have established if fluorescence exceeded  $5 \times 10^5$   
560 units, chosen by comparison to pure cultures. In each test condition, the number of replicates in  
561 which resistance established was taken as data for model fitting, as in the previous seeding  
562 experiments.

563

#### 564 ***Fraction of dead cells by live-dead staining***

565

566 This experiment used the PA01:Rms149 resistant strain with no fluorescent label, to avoid  
567 interfering with the signal from the stains. We inoculated streptomycin treatment cultures (six  
568 replicates per concentration) with 10<sup>3</sup>-fold diluted overnight culture, as in the standard MIC assay.  
569 After 7h of treatment, we diluted test cultures 100-fold and stained with thiazole orange and  
570 propidium iodide (BD Cell Viability Kit, product no. 349483). In parallel, we diluted and stained  
571 media and heat-killed cultures as controls. We sampled 50 $\mu$ l per diluted culture using flow  
572 cytometry (BD Accuri C6 Flow Cytometer with fast fluidics, discarding events with forward scatter  
573 FSC-H < 10000 or side scatter SSC-H < 8000). The staining and flow cytometry steps were carried out  
574 in groups containing one replicate per concentration plus controls, to avoid potentially toxic effects  
575 of stain exposure over prolonged times (**Suppl. Text**, section 7). To better discriminate cells from  
576 background in the flow cytometry data, we first gated on events according to forward and side  
577 scatter before defining clusters of dead (membrane-compromised) and intact cells based on  
578 fluorescence; see **Suppl. Text**, section 7, and **Suppl. Fig. 6** for details.

579

#### 580 ***Viable cell density dynamics***

581

582 Using the YFP-labelled PA01:Rms149 strain, we tracked the number of viable cells over time in  
583 streptomycin-free media (twelve replicates per time point) and at 1/32, 1/16, 1/8, and 1/4 x MIC<sub>R</sub>  
584 streptomycin (six replicates per time point). An independent test plate was used for sampling at

585 each time point. Lower (Set A) and higher (Set B) streptomycin concentrations were split across  
586 separate plates and sampled at different times. Cultures were inoculated with 20 $\mu$ l of 5 x 10<sup>5</sup>-fold  
587 diluted overnight culture. At each sampling time, we plated 5 x 4 $\mu$ l spots of undiluted cultures (10%  
588 sampling by volume). The number of viable cells was estimated from total colony count following  
589 incubation. Comparison of streptomycin-free controls from both sets (A and B) indicated that the  
590 plate set effect was non-significant (ANOVA:  $p = 0.10$ ); thus, controls were pooled for further  
591 analysis of the streptomycin effect (see **Suppl. Text**, section 8, for further details).

592

### 593 ***Mathematical model of establishment***

594

595 Model: We denote by  $p_w$  the probability that a small number of inoculated cells grows into a large  
596 population, i.e. that the culture reaches detectable OD as described above. Among a set of  $n$   
597 independent replicates, the number of cultures showing growth is thus described by a  
598 Binomial( $n, p_w$ ) distribution.

599

600 In the “null” model, similar to previous work [46, 45], a simple expression for  $p_w$  is derived under the  
601 assumptions that: (i) the number of cells in the inoculum is Poisson-distributed with mean  $\bar{N}$ ; (ii)  
602 each cell, *independently*, establishes a surviving lineage with probability  $p_c$ , which depends only on  
603 antibiotic concentration  $x$ ; and (iii) culture growth is observed provided at least one cell establishes a  
604 surviving lineage. Then the probability of observing culture growth, as a function of mean inoculum  
605 size and antibiotic concentration, can be written as follows (**Suppl. Text**, section 10):

606

607

$$\begin{aligned} p_w(\bar{N}, x) &= 1 - e^{-\bar{N}p_c(x)} \\ &= 1 - e^{-\bar{N}_{eff}\tilde{p}_c(x)} \end{aligned} \quad \text{(Eqn. 1)}$$

608

609

610 In the second line, we have rewritten the expression in terms of the “effective mean inoculum size”,  
611  $\bar{N}_{eff} = \bar{N}p_c(0)$ , which is the mean number of established lineages in the absence of antibiotics; and  
612 the “relative establishment probability”,  $\tilde{p}_c(x) = p_c(x)/p_c(0)$ . Although we expect that  $p_c(0)$  is  
613 close to 1,  $\bar{N}$  and  $p_c(0)$  play indistinguishable roles in this model, so that in practice we can only  
614 estimate their product. This definition of effective inoculum size based on cells that grow in benign  
615 conditions is similar to the usual quantification of “viable” cells according to successful formation of  
616 a colony; we simply assess growth in liquid rather than on solid medium. Scaling up  $\bar{N}_{eff}$  by the  
617 dilution factor applied to the inoculating culture, we have an estimate of bacterial density in this  
618 culture, equivalent to the historical “most probable number” method [56, 57]. If cells are

619 phenotypically heterogeneous (i.e. vary in their propensity to establish), or if the individual units in  
620 the inoculum are actually clumps of cells, then  $p_c$  should be interpreted as the mean establishment  
621 probability among individuals (**Suppl. Text**, section 10.1).

622

623 More generally, we need not assume that cells establish independently. If we suppose simply that  
624 the number of established lineages is Poisson-distributed with some mean  $\alpha$  (which is supported  
625 empirically by the distribution of colony-forming units counted in highly diluted cultures; **Suppl. Fig.**  
626 **1**), we have the relationship

627

$$628 \quad p_w(\bar{N}, x) = 1 - e^{-\alpha(\bar{N}, x)} \quad (\text{Eqn. 2})$$

629

630 where  $\alpha$ , and hence  $p_w$ , have an arbitrary dependence on mean inoculum size and antibiotic  
631 concentration. In the statistical “full model”, we estimate a distinct  $p_w$  (or equivalently  $\alpha$ , by the one-  
632 to-one mapping in **Eqn. 2**) in each test condition. Relative establishment probability is then generally  
633 defined by  $\tilde{p}_c(\bar{N}, x) = \alpha(\bar{N}, x)/\alpha(\bar{N}, 0)$ . Nested models, including the null model above, make  
634 additional assumptions about the form of  $\alpha$  (see **Suppl. Text**, section 10, for details).

635

636 Likelihood-based model fitting and comparisons: These stochastic models are fit to experimental  
637 population growth data using likelihood-based methods (**Suppl. Text**, section 11). Specifically, under  
638 each model we obtain a maximum likelihood estimate and a 95% confidence interval (determined by  
639 the range of parameter values that would not be rejected by a likelihood ratio test at 5% significance  
640 level) on the parameter  $p_w$ , which can be transformed to an estimate for  $\alpha$ . In the case of relative  
641 establishment probability,  $\tilde{p}_c(x) = \alpha(x)/\alpha(0)$ , we use a profile likelihood confidence interval  
642 accounting for the uncertainty in both numerator (i.e. results at antibiotic concentration  $x$ ) and  
643 denominator (i.e. results in antibiotic-free conditions). The fit of nested models is compared using  
644 the likelihood ratio test (LRT) at 5% significance level, i.e. a  $\chi^2$  test on model deviance with degrees  
645 of freedom equal to the difference in number of fitted parameters between the two models.

646

647 To test the null model of the inoculum size effect, we neglect any experimental error in preparing  
648 overnight culture dilutions, and assume that mean inoculum size  $\bar{N}$  is inversely proportional to the  
649 applicable dilution factor. Effective mean inoculum size,  $\bar{N}_{eff}$ , is estimated by fitting **Eqn. 1** to  
650 population growth data in antibiotic-free media. Per-cell relative establishment probability  $\tilde{p}_c$  then  
651 remains as the single free parameter to fit at each tested antibiotic concentration. The goodness of

652 fit of the null model (**Eqn. 1**) is assessed for each test concentration separately, using the LRT to  
653 compare it to the fit of the full model (**Eqn. 2**).

654

655 All model fitting was implemented in R, version 3.3.1 (The R Foundation for Statistical Computing,  
656 2016).

657

658

659 **Acknowledgements:** H.K.A. was supported by an Early Postdoc.Mobility Fellowship  
660 (P2EZP3\_165188) and an Advanced Postdoc.Mobility fellowship (P300PA\_177789) from the Swiss  
661 National Science Foundation. R.C.M. was supported by Wellcome Trust Grant 106918/Z/15/Z. We  
662 thank Isabel Frost, Natalia Kapel, Lois Ogunlana, Andrei Papkou, and Célia Souque for advice and  
663 assistance on experimental protocols.

664

665 **Author contributions:** H.K.A. and R.C.M. conceived of the study and designed experiments. H.K.A.  
666 carried out experiments and data analysis with advice from R.C.M. H.K.A. developed the  
667 mathematical model, wrote the code and carried out model fitting. H.K.A. and R.C.M. wrote the  
668 manuscript.

669

670 **Data and code availability:** Data generated in this study, as well as custom R scripts for likelihood-  
671 based model fitting and comparisons, will be made available upon manuscript acceptance.

672

673

## 674 **References**

675

- [1] D. N. Fish, S. C. Piscitelli and L. H. Danziger, "Development of resistance during antimicrobial therapy: a review of antibiotic classes and patient characteristics in 173 studies," *Pharmacotherapy*, vol. 15, no. 3, pp. 279-291, 1995.
- [2] World Health Organization, "Antimicrobial Resistance: Global Report on Surveillance," World Health Organization, Geneva, 2014.
- [3] X. Zhao and K. Drlica, "Restricting the selection of antibiotic-resistant mutants: a general strategy derived from fluoroquinolone studies," *Clin. Infect. Dis.*, vol. 33 (Suppl 3), pp. S147-S156, 2001.
- [4] X. Zhao and K. Drlica, "Restricting the selection of antibiotic-resistant mutant bacteria: measurement and potential use of the mutant selection window," *J. Infect. Dis.*, vol. 185, pp. 561-565, 2002.
- [5] K. Drlica and X. Zhao, "Mutant selection window hypothesis updated," *Clin. Infect. Dis.*, vol. 44, pp. 681-688, 2007.

- [6] R. Canton and M.-I. Morosini, "Emergence and spread of antibiotic resistance following exposure to antibiotics," *FEMS Microbiol. Rev.*, vol. 35, pp. 977-991, 2011.
- [7] D. I. Andersson and D. Hughes, "Evolution of antibiotic resistance at non-lethal drug concentrations," *Drug Resistance Updates*, vol. 15, pp. 162-172, 2012.
- [8] T. Day, S. Huijben and A. F. Read, "Is selection relevant in the evolutionary emergence of drug resistance?," *Trends Microbiol.*, vol. 23, pp. 126-133, 2015.
- [9] D. I. Andersson, "Improving predictions of the risk of resistance development against new and old antibiotics," *Clin. Microbiol. Infect.*, vol. 21, pp. 894-898, 2015.
- [10] European Committee for Antimicrobial Susceptibility Testing (EUCAST), "Determination of minimum inhibitory concentrations (MICs) of antibacterial agents by broth dilution," *Clin. Microbiol. Infect.*, vol. 9, pp. 1-7, 2003.
- [11] M.-C. Negri, M. Lipsitch, J. Blázquez, B. R. Levin and F. Baquero, "Concentration-dependent selection of small phenotypic differences in TEM beta-lactamase-mediated antibiotic resistance," *Antimicrob. Agents Chemother.*, vol. 44, pp. 2485-2491, 2000.
- [12] A. Liu, A. Fong, E. Becket, J. Yuan, C. Tamae, L. Medrano, M. Maiz, C. Wahba, C. Lee, K. Lee, K. P. Tran, H. Yang, R. M. Hoffman, A. Salih and J. H. Miller, "Selective advantage of resistant strains at trace levels of antibiotics: a simple and ultrasensitive color test for detection of antibiotics and genotoxic agents," *Antimicrob. Agents Chemother.*, vol. 55, no. 3, pp. 1204-1210, 2011.
- [13] E. Gullberg, S. Cao, O. G. Berg, C. Ilbäck, L. Sandegren, D. Hughes and D. I. Andersson, "Selection of resistant bacteria at very low antibiotic concentrations," *PLoS Pathogens*, vol. 7, p. e1002158, 2011.
- [14] S. Kalghatgi, C. S. Spina, J. C. Costello, M. Liesa, J. R. Morones-Ramirez, S. Slomovic, A. Molina, O. S. Shirihai and J. J. Collins, "Bactericidal antibiotics induce mitochondrial dysfunction and oxidative damage in mammalian cells," *Sci. Transl. Med.*, vol. 5, p. 192ra85, 2013.
- [15] A. Prayle, A. Watson, H. Fortnum and A. Smyth, "Side effects of aminoglycosides on the kidney, ear and balance in cystic fibrosis," *Thorax*, vol. 65, pp. 654-658, 2010.
- [16] P. Abel zur Wiesch, R. Kouyos, J. Engelstädter, R. R. Regoes and S. Bonhoeffer, "Population biological principles of drug-resistance evolution in infectious diseases," *Lancet Infect. Dis.*, vol. 11, pp. 236-247, 2011.
- [17] Z. Patwa and L. M. Wahl, "The fixation probability of beneficial mutations," *J. R. Soc. Interface*, vol. 5, pp. 1279-1289, 2008.
- [18] M. F. Schenk, I. G. Szendro, J. Krug and J. A. G. M. de Visser, "Quantifying the adaptive potential of an antibiotic resistance enzyme," *PLoS Genet.*, vol. 8, p. e1002783, 2012.
- [19] J. Coates, B. R. Park, D. Le, E. Simsek, W. Chaudhry and M. Kim, "Antibiotic-induced population fluctuations and stochastic clearance of bacteria," *eLife*, vol. 7, p. e32976, 2018.
- [20] I. Levin-Reisman, I. Ronin, O. Gefen, I. Braniss, N. Shoshitaishvili and N. Q. Balaban, "Antibiotic tolerance facilitates the evolution of resistance," *Science*, vol. 355, pp. 826-830, 2017.
- [21] D. M. Livermore, "Multiple mechanisms of antimicrobial resistance in *Pseudomonas aeruginosa*: our worst nightmare?," *Clin Infect Dis*, vol. 34, pp. 634-640, 2002.
- [22] I. Brook, "Inoculum effect," *Rev. Infect. Dis.*, vol. 11, pp. 361-368, 1989.
- [23] K. I. Udekwe, N. Parrish, P. Ankomah, F. Baquero and B. R. Levin, "Functional relationship between bacterial cell density and the efficacy of antibiotics," *J. Antimicrob. Chemother.*, vol. 63, pp. 745-757, 2009.
- [24] T. Artemova, Y. Gerardin, C. Dudley, N. M. Vega and J. Gore, "Isolated cell behavior drives the evolution of antibiotic resistance," *Molec. Syst. Biol.*, vol. 11, p. 822, 2015.

- [25] K. C. Haltalin and J. D. Nelson, "In vitro susceptibility of Shigellae to sodium sulfadiazine and to eight antibiotics," *JAMA*, vol. 193, pp. 705-710, 1965.
- [26] S. E. McLinn, J. D. Nelson and K. C. Haltalin, "Antimicrobial susceptibility of *Hemophilus influenzae*," *Pediatrics*, vol. 45, pp. 827-838, 1970.
- [27] M. Tato, T. M. Coque, F. Baquero and R. Cantón, "Dispersal of carbapenemase blaVIM-1 gene associated with different Tn402 variants, mercury transposons, and conjugative plasmids in Enterobacteriaceae and *Pseudomonas aeruginosa*," *Antimicrob. Agents Chemother.*, vol. 54, pp. 320-327, 2010.
- [28] A. San Millan, M. Toll-Riera, J. A. Escudero, R. Cantón, T. M. Coque and R. C. MacLean, "Sequencing of plasmids pAMBL1 and pAMBL2 from *Pseudomonas aeruginosa* reveals a blaVIM-1 amplification causing high-level carbapenem resistance," *J. Antimicrob. Chemother.*, vol. 70, pp. 3000-3003, 2015.
- [29] M. Fritzenwanker, C. Imirzalioglu, S. Herold, F. M. Wagenlehner, K.-P. Zimmer and T. Chakraborty, "Treatment options for carbapenem-resistant gram-negative infections," *Dtsch. Arztebl. Int.*, vol. 115, pp. 345-352, 2018.
- [30] M. S. Walters, J. E. Grass, S. N. Bulens, E. B. Hancock, E. C. Phipps, D. Muleta, J. Mounsey, M. A. Kainer, C. Concannon, G. Dumyati, C. Bower, J. Jacob, P. M. Cassidy, Z. Beldavs, K. Culbreath, W. E. Phillips Jr., D. J. Hardy, R. L. Vargas, M. Oethinger, U. Ansari, R. Stanton, V. Albrecht, A. L. Halpin, M. Karlsson, J. K. Rasheed and A. Kallen, "Carbapenem-resistant *Pseudomonas aeruginosa* at US emerging infections program sites, 2015," *Emerg. Infect. Dis.*, vol. 25, pp. 1281-1288, 2019.
- [31] World Health Organization, "Prioritization of pathogens to guide discovery, research and development of new antibiotics for drug-resistant bacterial infections, including tuberculosis," World Health Organization, Geneva, 2017.
- [32] I. Frost, W. P. J. Smith, S. Mitri, A. San Millan, Y. Davit, J. M. Osborne, J. M. Pitt-Francis, R. C. MacLean and K. R. Foster, "Cooperation, competition and antibiotic resistance in bacterial colonies," *ISME J.*, vol. 12, pp. 1582-1593, 2018.
- [33] M. A. Brockhurst, F. Harrison, J.-W. Veening, E. Harrison, G. Blackwell, Z. Iqbal and C. Maclean, "Assessing evolutionary risks of resistance for new antimicrobial therapies," *Nature Ecol. Evol.*, vol. 3, pp. 515-517, 2019.
- [34] P. Abel zur Wiesch, S. Abel, S. Gkotzis, P. Ocampo, J. Engelstädter, T. Hinkley, C. Magnus, M. K. Waldor, K. Udekwu and T. Cohen, "Classic reaction kinetics can explain complex patterns of antibiotic action," *Sci. Transl. Med.*, vol. 7, p. 287ra73, 2015.
- [35] E. A. Yurtsev, H. X. Chao, M. S. Datta, T. Artemova and J. Gore, "Bacterial cheating drives the population dynamics of cooperative antibiotic resistance plasmids," *Molec. Syst. Biol.*, vol. 9, p. 683, 2013.
- [36] N. M. Vega and J. Gore, "Collective antibiotic resistance: mechanisms and implications," *Curr. Opin. Microbiol.*, vol. 21, pp. 28-34, 2014.
- [37] R. A. Sorg, L. Lin, G. S. van Doorn, M. Sorg, J. Olson, V. Nizet and J.-W. Veening, "Collective resistance in microbial communities by intracellular antibiotic deactivation," *PLoS Biol.*, vol. 14, p. e2000631, 2016.
- [38] H. R. Meredith, J. K. Srimani, A. J. Lee, A. J. Lopatkin and L. You, "Collective antibiotic tolerance: mechanisms, dynamics and intervention," *Nat. Chem. Biol.*, vol. 11, pp. 182-188, 2015.
- [39] I. El Meouche, Y. Siu and M. J. Dunlop, "Stochastic expression of a multiple antibiotic resistance activator confers transient resistance in single cells," *Sci. Rep.*, vol. 6, p. 19538, 2016.
- [40] T. Bergmiller, A. M. C. Andersson, K. Tomasek, E. Balleza, D. J. Kiviet, R. Hauschild, G. Tkačik and C. C. Guet, "Biased partitioning of the multidrug efflux pump AcrAB-TolC underlies long-lived phenotypic heterogeneity," *Science*, vol. 356, pp. 311-315, 2017.

- [41] D. R. Gifford, J. A. G. M. de Visser and L. M. Wahl, "Model and test in a fungus of the probability that beneficial mutations survive drift," *Biol. Lett.*, vol. 9, p. 20120310, 2012.
- [42] D. R. Gifford and R. C. MacLean, "Evolutionary reversals of antibiotic resistance in experimental populations of *Pseudomonas aeruginosa*," *Evolution*, vol. 67, pp. 2973-2981, 2013.
- [43] H. K. Alexander, G. Martin, O. Y. Martin and S. Bonhoeffer, "Evolutionary rescue: linking theory for conservation and medicine," *Evol. Appl.*, vol. 7, pp. 1161-1179, 2014.
- [44] G. Bell and A. Gonzalez, "Evolutionary rescue can prevent extinction following environmental change," *Ecol. Lett.*, vol. 12, pp. 942-948, 2009.
- [45] G. Martin, R. Aguilée, J. Ramsayer, O. Kaltz and O. Ronce, "The probability of evolutionary rescue: towards a quantitative comparison between theory and evolution experiments," *Phil. Trans. R. Soc. B*, vol. 368, p. 20120088, 2013.
- [46] H. A. Druett, "Bacterial invasion," *Nature*, vol. 170, p. 288, 1952.
- [47] R. E. Moxon and P. A. Murphy, "Haemophilus influenzae bacteremia and meningitis resulting from survival of a single organism," *PNAS*, vol. 75, no. 3, pp. 1534-1536, 1978.
- [48] K. Koutsoumanis, "A study on the variability in the growth limits of individual cells and its effect on the behavior of microbial populations," *Int. J. Food Microbiol.*, vol. 128, pp. 116-121, 2008.
- [49] L. A. Liotta, G. M. Saidel and J. Kleinerman, "Stochastic model of metastases formation," *Biometrics*, vol. 32, no. 3, pp. 535-550, 1976.
- [50] M. A. Kohanski, M. A. DePristo and J. J. Collins, "Sublethal antibiotic treatment leads to multidrug resistance via radical-induced mutagenesis," *Molec. Cell*, vol. 37, pp. 311-320, 2010.
- [51] A. Frenoy and S. Bonhoeffer, "Death and population dynamics affect mutation rate estimates and evolvability under stress in bacteria," *PLoS Biol.*, vol. 16, p. e2005056, 2018.
- [52] S. J. Dancer, "How antibiotics can make us sick: the less obvious adverse effects of antimicrobial chemotherapy," *Lancet Infect. Dis.*, vol. 4, pp. 611-619, 2004.
- [53] A. S. Haines, K. Jones, M. Cheung and C. M. Thomas, "The IncP-6 plasmid Rms149 consists of a small mobilizable backbone with multiple large insertions," *J. Bacteriol.*, vol. 187, pp. 4728-4738, 2005.
- [54] A. San Millan, K. Heilbron and R. C. MacLean, "Positive epistasis between co-infecting plasmids promotes plasmid survival in bacterial populations," *ISME J.*, vol. 8, pp. 601-612, 2014.
- [55] D. Sandvang, "Novel streptomycin and spectinomycin resistance gene as a gene cassette within a class 1 integron isolated from *Escherichia coli*," *Antimicrob. Agents Chemother.*, vol. 43, pp. 3036-3038, 1999.
- [56] W. G. Cochran, "Estimation of bacterial densities by means of the "most probable number"," *Biometrics*, vol. 6, pp. 105-116, 1950.
- [57] M. A. Hurley and M. E. Roscoe, "Automated statistical analysis of microbial enumeration by dilution series," *J. Appl. Bacteriol.*, vol. 55, pp. 159-164, 1983.



678 **Figures**

679

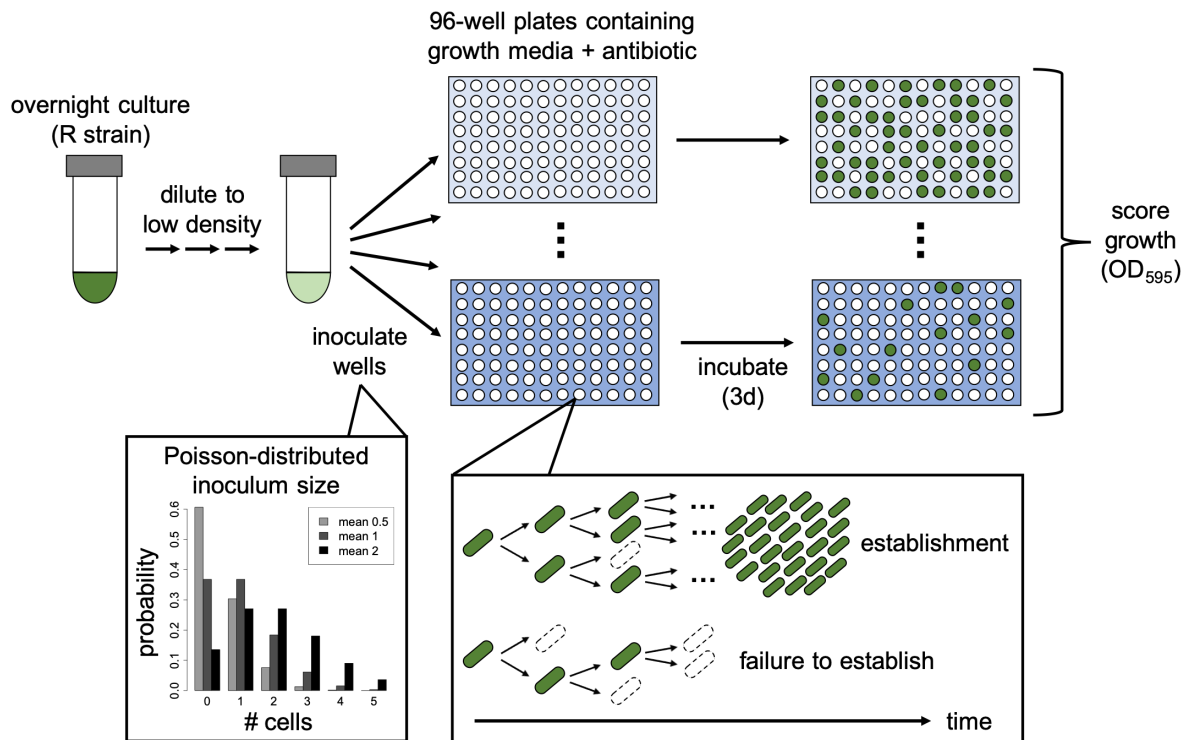

680

681

682 **Figure 1: Design of seeding experiments to estimate establishment probability.** An overnight  
683 culture of the resistant strain is highly diluted and used to inoculate 96-well plates containing growth  
684 media (LB broth) with antibiotic at various concentrations (shades of blue). The number of cells  
685 inoculated per well follows a Poisson distribution (examples plotted for mean inoculum size of 0.5, 1,  
686 or 2 cells per well). Within these culture wells, stochastic population dynamics imply that each  
687 inoculated cell may either produce a large number of descendants (*establishment*) or produce  
688 no/few descendants that ultimately die out (*failure to establish*). Plates are incubated for 3 days and  
689 optical density is measured to score growth in wells ( $OD_{595} > 0.1$ ; dark green). The number of  
690 replicate cultures showing growth is used to estimate the per-cell establishment probability at each  
691 antibiotic concentration by fitting a mathematical model.

692

693 (a)

|                                          |                       | [Strep] (x MIC <sub>R</sub> ) |      |      |      |     |
|------------------------------------------|-----------------------|-------------------------------|------|------|------|-----|
|                                          |                       | 0                             | 1/64 | 1/32 | 1/16 | 1/8 |
| experiment 1                             |                       |                               |      |      |      |     |
| dilution factor<br>of inoculated culture | 4 x 10 <sup>7</sup>   | 86                            | 85   | 84   | 75   | 9   |
|                                          | 8 x 10 <sup>7</sup>   | 55                            | 48   | 51   | 43   | 4   |
|                                          | 1.6 x 10 <sup>8</sup> | 26                            | 34   | 26   | 25   | 2   |
| experiment 2                             |                       |                               |      |      |      |     |
| dilution factor<br>of inoculated culture | 4 x 10 <sup>7</sup>   | 94                            | 92   | 92   | 82   | 9   |
|                                          | 8 x 10 <sup>7</sup>   | 81                            | 81   | 80   | 64   | 7   |
|                                          | 1.6 x 10 <sup>8</sup> | 53                            | 55   | 61   | 32   | 0   |

(b)

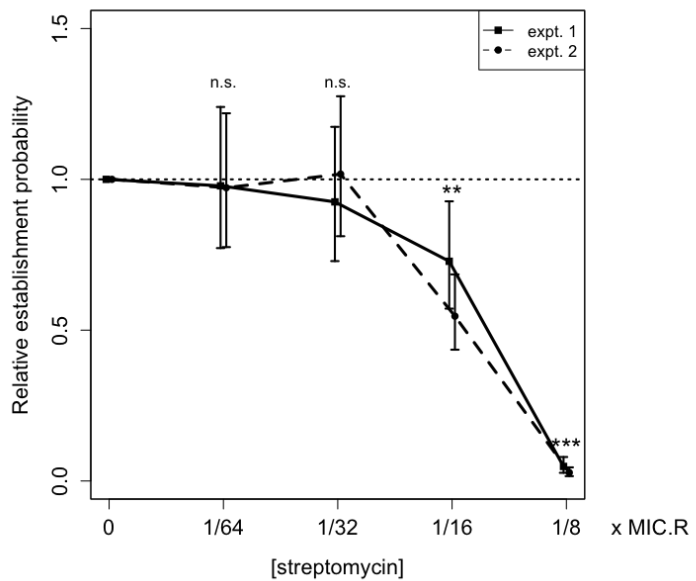

694

695 **Figure 2: Establishment probability of single PA01:Rms149 streptomycin-resistant cells, estimated**

696 **from seeding experiments. (a) Visual representation of the growth data, indicating the number of**

697 **replicate cultures (out of 96) that grew in each test condition up to 3d post-inoculation. (b)**

698 **Estimated relative per-cell establishment probability ( $\tilde{p}_c$ ), scaled by the probability in**

699 **streptomycin-free medium, as a function of streptomycin concentration, scaled by the standard MIC**

700 **value of the resistant strain (MIC<sub>R</sub> = 2048μg/ml; Table S1). Results are shown for two separate**

701 **experiments. Plotted points indicate the maximum likelihood estimate of  $\tilde{p}_c$  and error bars indicate**

702 **the 95% confidence interval, using the fitted model selected by the likelihood ratio test (experiment**

703 **1: Model B', fixed environmental effect; experiment 2: Model C', the null model [Eqn. 1]. Both of**

704 **these models pool data across three inoculation densities; see Suppl. Text, section 10, for details).**

705 **Significance of the streptomycin effect is determined by fitting a generalized linear model to the**

706 **population growth data (n.s.: not significant,  $p > 0.05$ ; \*\*  $p=0.01$  in expt. 1,  $p=2e-7$  in expt. 2, and**

707  **$p=2e-8$  pooling both experiments; \*\*\*  $p < 2e-16$  in both experiments; see Suppl. Text, section 14.1,**

708 **for full results).**

709

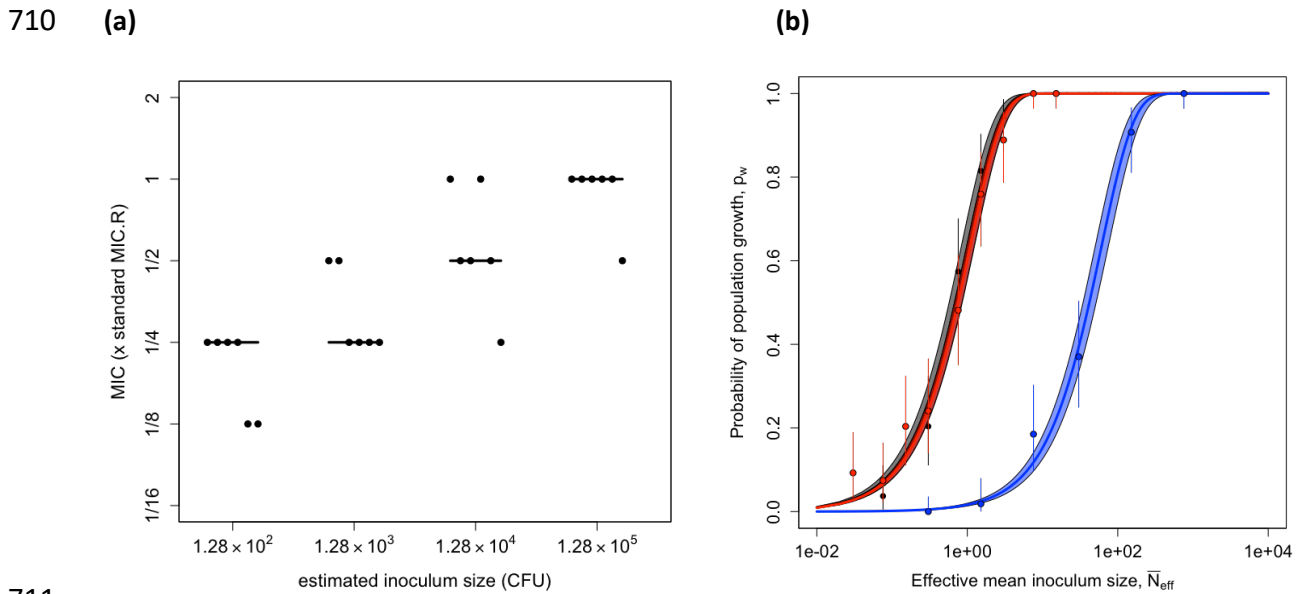

711

712 **Figure 3: Inoculum size effects on MIC and probability of population growth of the resistant**

713 **PA01:Rms149 strain in streptomycin. (a) MIC as a function of inoculum size.** Cultures were

714 inoculated with PA01:Rms149 at four different inoculum sizes. MIC was evaluated as the minimal

715 tested streptomycin concentration that prevented detectable growth up to 3d post-inoculation; a

716 qualitatively similar pattern arose if growth was evaluated at 20h (**Fig. S2**). The y-axis is scaled by the

717 MIC of this strain at standard inoculation density (MIC<sub>R</sub>). The points represent six replicates at each

718 inoculum size, with the line segments indicating their median. **(b) Null model of the inoculum size**

719 **effect (Eqn. 1) fit to culture growth data.** Probability of population growth (p<sub>w</sub>) is plotted as a

720 function of effective mean inoculum size (N<sub>eff</sub>, calibrated by the results in streptomycin-free media;

721 see **Fig. S4**). Black: streptomycin-free; red: streptomycin at 1/16 × MIC<sub>R</sub>; blue: 1/8 × MIC<sub>R</sub>. These

722 results are based on growth in streptomycin up to 5d post-inoculation; see **Suppl. Text**, section 15,

723 for results at 3d post-inoculation. Points indicate the proportion of replicate cultures showing

724 growth, i.e. the maximum likelihood estimate (MLE) of p<sub>w</sub> in the full model, with error bars indicating

725 the 95% confidence interval (CI). The solid line shows the best fit of the null model (i.e. **Eqn. 1**

726 parameterized with the MLE of  $\tilde{p}_c$ ) and the shaded area corresponds to the 95% CI. According to the

727 likelihood ratio test, the null model deviance from the full model is not significant at any

728 streptomycin concentration (streptomycin-free: p=0.55; 1/16 × MIC<sub>R</sub>: p=0.28; 1/8 × MIC<sub>R</sub>: p=0.71; see

729 **Suppl. Text**, section 15, for full results).

730

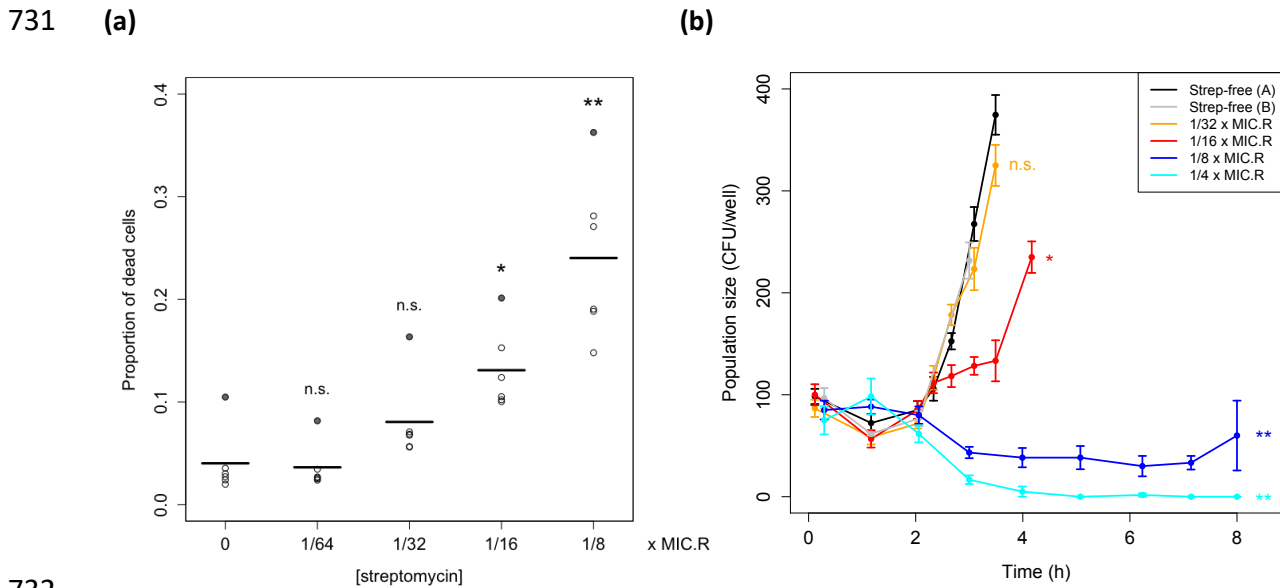

732

733 **Figure 4: Effects of sub-MIC<sub>R</sub> streptomycin treatment on PA01:Rms149 resistant cell dynamics. (a)**

734 **Proportion of dead cells after 7h in sub-MIC<sub>R</sub> streptomycin.** The proportion of dead cells in

735 streptomycin-treated cultures was estimated using live-dead staining and flow cytometry. Points

736 represent six independent treatment replicates at each concentration and line segments indicate

737 their mean. Differences from the streptomycin-free control cultures were assessed using a one-way

738 ANOVA followed by a post-hoc Dunnett's test (n.s.: not significant,  $p > 0.05$ ; \*:  $p = 9e-3$ , \*\*:  $p < 1e-$

739 4). Effects identified as significant do not change if we exclude an outlier replicate (shaded-in points)

740 showing consistently elevated dead cell fractions (**Table S3**). **(b) Viable cell population dynamics in**

741 **sub-MIC<sub>R</sub> streptomycin.** Points with connecting lines indicate the mean number of viable cells across

742 six replicate cultures per streptomycin concentration, per sampling time point (or twelve replicates

743 for streptomycin-free controls); the error bars indicate standard error. **Fig. S7** shows all individual

744 replicates. Viable cell numbers were estimated by plating undiluted culture samples; plots are

745 truncated when colonies became too dense to count. Significance of each streptomycin

746 concentration compared to the streptomycin-free control was assessed by a post-hoc Dunnett's test

747 (n.s.: not significant,  $p=0.87$ ; \*  $p=4e-4$ ; \*\*  $p<1e-4$ ).

748

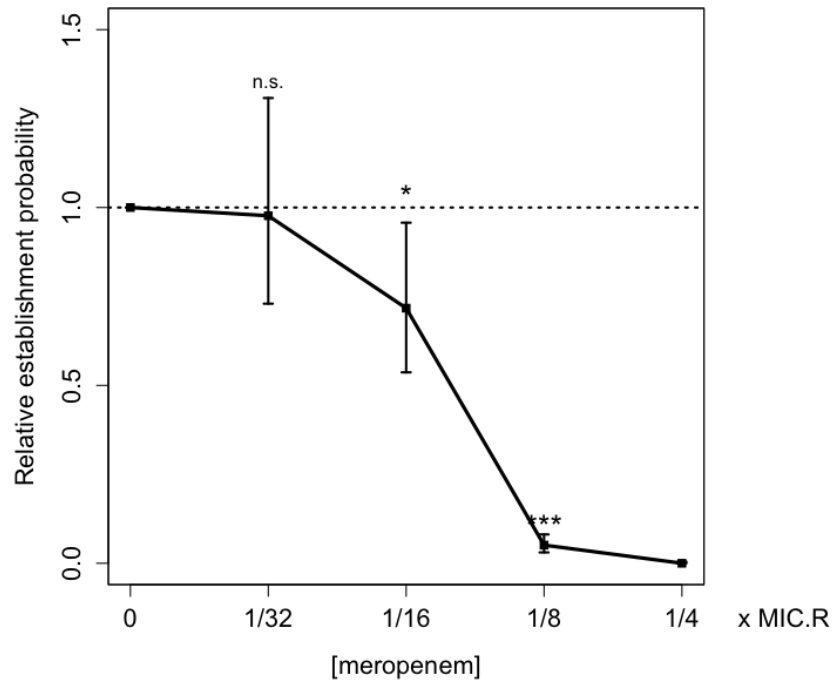

749

750 **Figure 5: Estimated relative per-cell establishment probability of the PA01:PAMBL2 meropenem-**  
751 **resistant strain as a function of meropenem concentration.** Concentration is scaled by the standard  
752 MIC of this strain in meropenem ( $MIC_R = 512 \mu\text{g/ml}$ ; **Table S1**). Plotted points indicate the maximum  
753 likelihood estimate of  $\tilde{p}_c$  and error bars indicate the 95% confidence interval, using the fitted model  
754 selected by the likelihood ratio test (Model C', the null model [Eqn. 1], which pools data across two  
755 tested inoculation densities). Significance of the meropenem effect is determined by fitting a  
756 generalized linear model (GLM) to population growth data (n.s.: not significant,  $p > 0.05$ ; \*  $p = 0.02$ ;  
757 \*\*\*  $p < 2e-16$ ; see **Suppl. Text**, section 14.2, for full results).  $1/4 \times MIC_R$  meropenem was excluded  
758 from the GLM because zero replicates established.

759

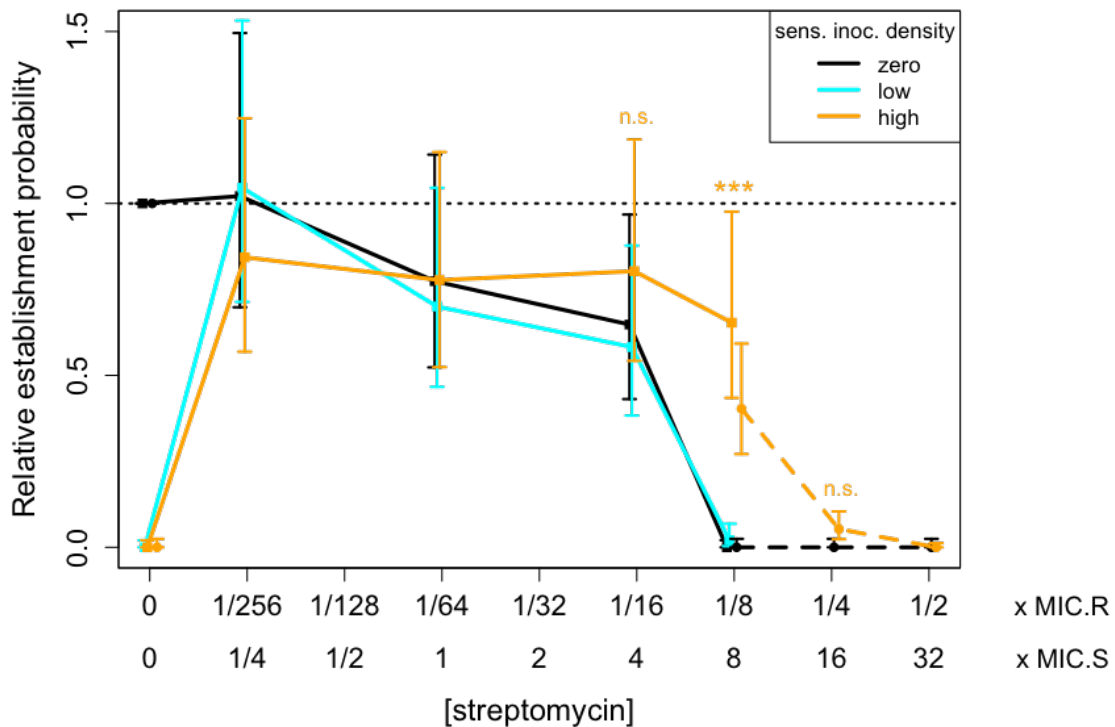

760

761 **Figure 6: Impact of a large sensitive population on the establishment probability of a resistant cell.**

762 The PA01:Rms149 resistant strain was seeded either alone (black) or into a low-density (cyan) or  
 763 high-density (orange) sensitive PA01 population, across a range of streptomycin concentrations.

764 Results are shown from two separate experiments, testing different subsets of conditions

765 (experiment 1 – data points in squares with solid line; experiment 2 – data points in circles with  
 766 dashed line). Within each experiment, the estimated relative establishment probability per resistant

767 cell ( $\tilde{p}_c$ ) in each condition is normalized by the result for the resistant strain alone in streptomycin-

768 free media. Points indicate the maximum likelihood estimate of  $\tilde{p}_c$  and error bars indicate the 95%

769 confidence interval, using the fitted model selected by the likelihood ratio test (Model C', the null

770 model [Eqn. 1] for both experiments). At streptomycin concentrations of particular interest, the

771 number of replicates in which the resistant strain established in the presence of no or low-density

772 sensitive (pooled where applicable) vs. high-density sensitive was compared using a two-sided

773 Wilcoxon rank-sum test, with significance annotated on the plot (1/16x MIC<sub>R</sub>: experiment 1,  $p=0.17$ ;

774 1/8x MIC<sub>R</sub>: experiment 1,  $p < 2.2e-16$  and experiment 2,  $p=4.8e-8$ ; 1/4x MIC<sub>R</sub>: experiment 2,  $p=0.042$ ,

775 not significant after Bonferroni correction); see **Suppl. Text**, section 16, for further details.
